# Supplementary material for: A dual-mode resonance Rayleigh scattering and colorimetric alkaline phosphatase assay based on in situ ascorbic acid-induced signal generation from manganese dioxide nanosheets
Source: Royal Society of Chemistry journal article supplement (doi:10.1039/d0ra05741j), 2020-01-01
Supplement: d0ra05741j1.pdf [file d0ra05741j1.pdf]

Electronic Supplementary Material (ESI) for RSC Advances.  
This journal is © The Royal Society of Chemistry 2020

## Electronic Supplementary Information

### **A bi-mode RRS and colorimetric alkaline phosphatase assay based on in situ ascorbic acid-induced signal generation from manganese dioxide nanosheets†**

Shiyu Liu‡<sup>a</sup>, Xiaoxiao Song‡<sup>a</sup>, Jinping Li<sup>b</sup>, Jiahong Zhou<sup>a</sup>, Weidan Na<sup>\*,a</sup> and Dawei Deng<sup>\*,a,b</sup>

<sup>a</sup> Department of Biomedical Engineering, School of Engineering, China Pharmaceutical University, Nanjing 211198, China.

<sup>b</sup> Department of Pharmaceutical Engineering, School of Engineering, China Pharmaceutical University, Nanjing 211198, China. E-mail: dengdawei@cpu.edu.cn

† Electronic supplementary information (ESI) available. See DOI: 10.1039/x0xx00000x

‡ These authors contributed equally to this work.

\* Corresponding author

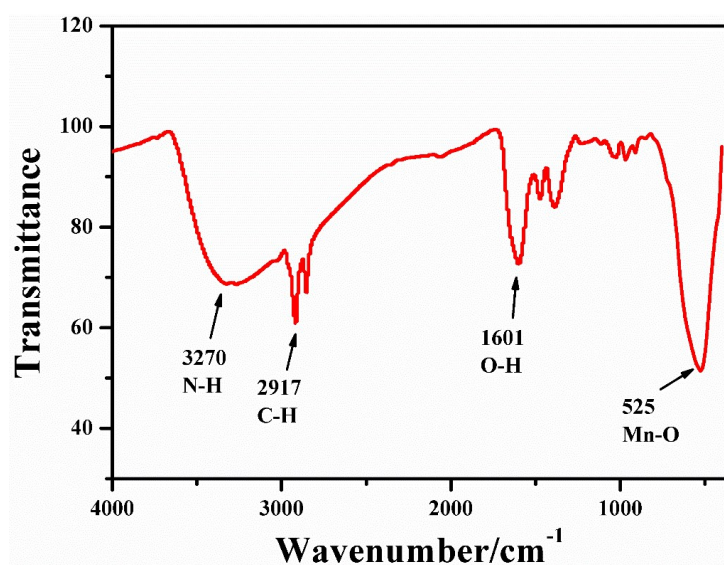

Fig. S1 FT-IR spectrum of the MnO<sub>2</sub> nanosheets.

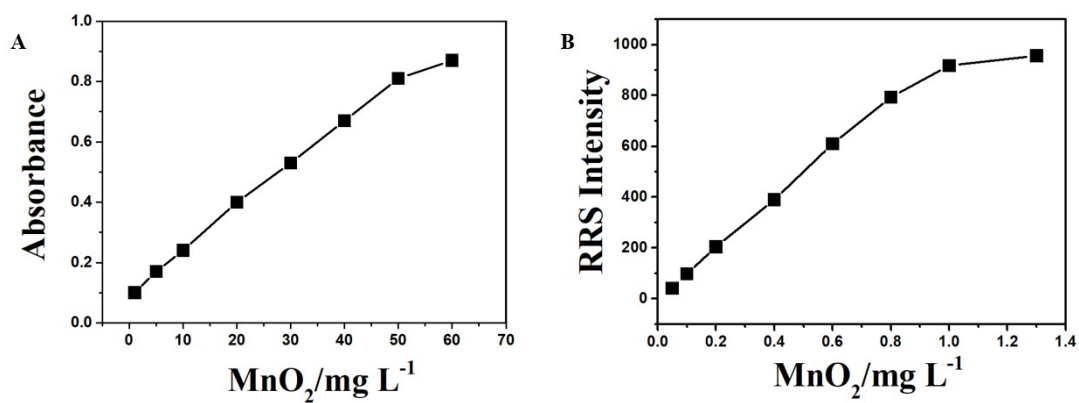

Fig. S2 Absorbance and RRS Intensity of MnO<sub>2</sub> nanosheets exhibited concentration dependence. (In our inspection system).

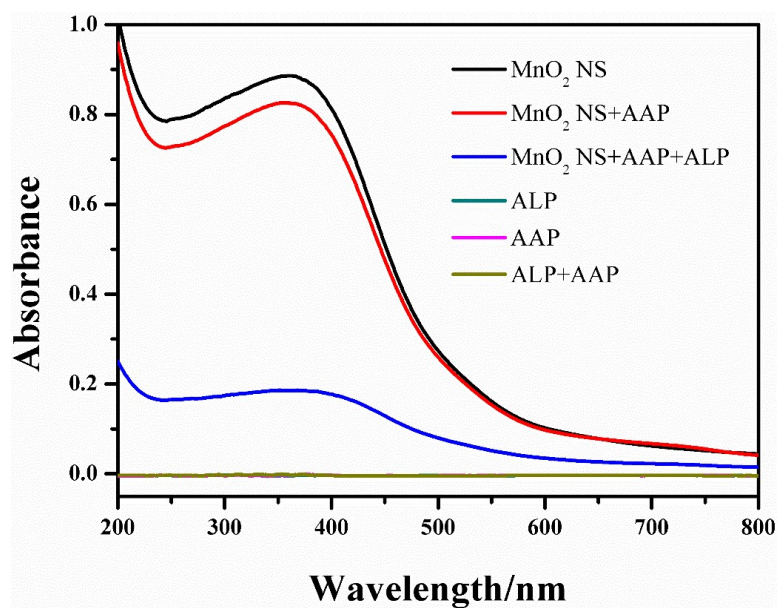

**Fig. S3** UV-vis absorption spectra of MnO<sub>2</sub> nanosheets (50 mg L<sup>-1</sup>); MnO<sub>2</sub> (50mg L<sup>-1</sup>) + AAP (2 mmol L<sup>-1</sup>); MnO<sub>2</sub> (50 mg) + AAP (2 mmol L<sup>-1</sup>) + ALP (200 U L<sup>-1</sup>); ALP; AAP; and AAP + ALP.

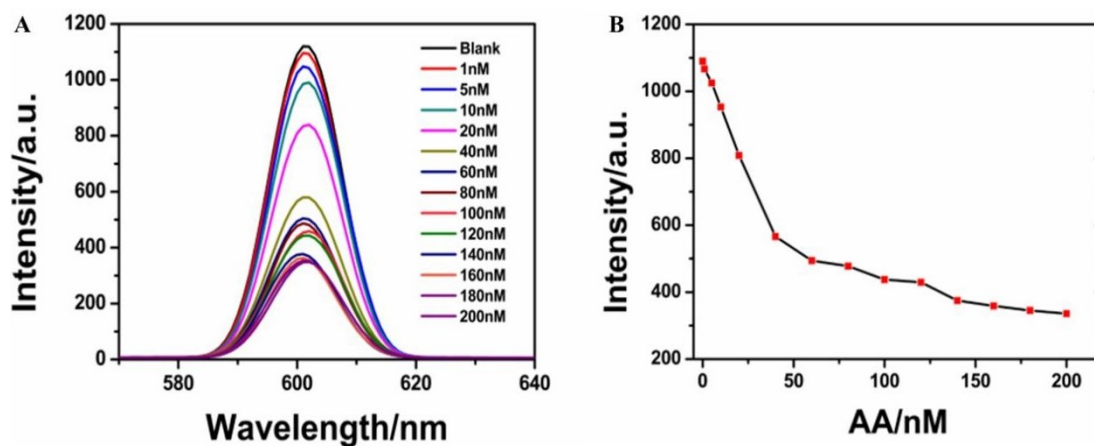

**Fig. S4** (A) RRS spectra of MnO<sub>2</sub> nanosheets with different concentration of AA (0, 1.0, 5.0, 10.0, 20.0, 40.0, 60.0, 80.0, 100.0, 120.0, 140.0, 160.0, 180.0 and 200 nmol L<sup>-1</sup>). The excitation wavelength was 600 nm. (B) The linear relationship of RRS intensity vs the level of AA. Reaction system: MnO<sub>2</sub> nanosheets, 1 mg L<sup>-1</sup>; 10 mmol L<sup>-1</sup> Phosphate buffer (pH, 7.4).

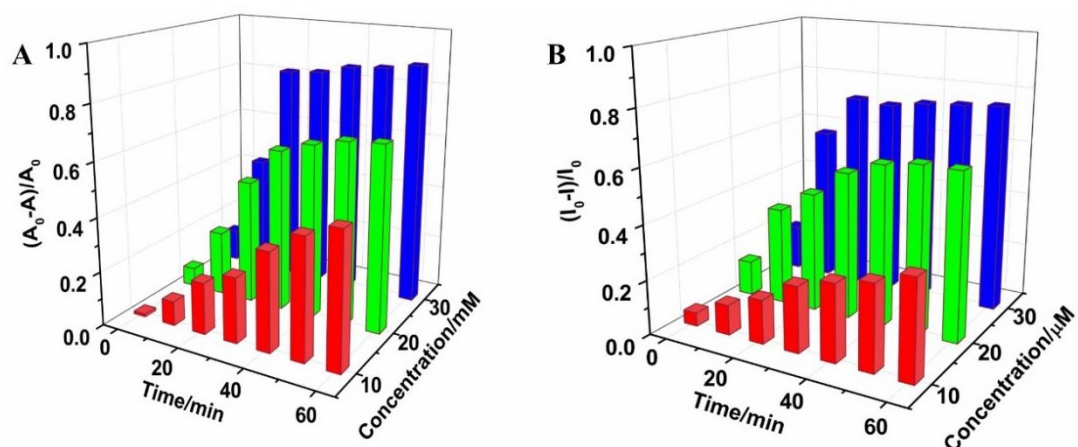

**Fig. S5** Ratio of  $(A_0-A)/A_0$  (A) and  $(I_0-I)/I_0$  (B) as a function of incubation time and AAP concentration. Reaction system A:  $50 \text{ mg L}^{-1}$   $\text{MnO}_2$  nanosheets and  $200 \text{ U L}^{-1}$  ALP;  $10 \text{ mmol L}^{-1}$  Phosphate buffer (pH, 7.4). Reaction system B:  $1 \text{ mg L}^{-1}$   $\text{MnO}_2$  nanosheets and  $200 \text{ mU L}^{-1}$  ALP;  $10 \text{ mmol L}^{-1}$  Phosphate buffer (pH, 7.4).

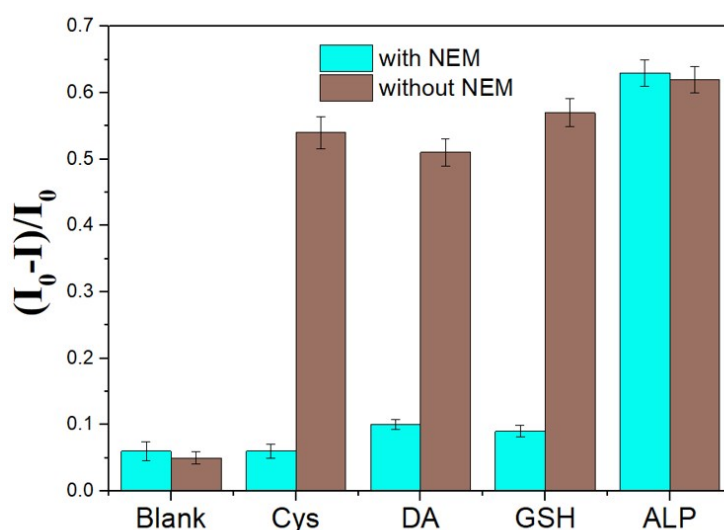

**Fig. S6** Ratio of  $(I_0-I)/I_0$  responses of different reducing substances on the selective detection of ALP activity. as a function of incubation time and AAP concentration. Reaction system:  $100 \text{ } \mu\text{mol L}^{-1}$  of Cys,  $100 \text{ } \mu\text{mol L}^{-1}$  of GSH or  $100 \text{ pmol L}^{-1}$  DA;  $10 \text{ mg L}^{-1}$  NEM;  $1 \text{ mg L}^{-1}$   $\text{MnO}_2$  nanosheets and  $200 \text{ mU L}^{-1}$  ALP;  $10 \text{ mmol L}^{-1}$  Phosphate buffer (pH, 7.4).

**Table S1.** Comparison of analytical performances for ALP assay via different methods.

| Method                                     | Linear range                           | LOD                     | Reference |
|--------------------------------------------|----------------------------------------|-------------------------|-----------|
| Colorimetric (MVCV)                        | 0.5-25 U L <sup>-1</sup>               | 0.1 U L <sup>-1</sup>   | 41        |
| Colorimetric (PDA liposomes)               | 0-100 U L <sup>-1</sup>                | 5.4 U L <sup>-1</sup>   | 42        |
| Fluorescence (Naphthalimide)               | 0-200 U L <sup>-1</sup>                | 0.25 U L <sup>-1</sup>  | 43        |
| Fluorescence (Carbon dots)                 | 2-100 U L <sup>-1</sup>                | 0.55 U L <sup>-1</sup>  | 44        |
| Electrochemical (CdS@GR-CoOOH)             | 10-300 U L <sup>-1</sup>               | 1.5 U L <sup>-1</sup>   | 45        |
| Electrochemical (TNA/QD PEC)               | 0.2-15 U L <sup>-1</sup>               | 0.15 U L <sup>-1</sup>  | 46        |
| Colorimetric (MnO <sub>2</sub> nanosheets) | 0.5-30.0; 30.0-140.0 U L <sup>-1</sup> | 0.16 U L <sup>-1</sup>  | This work |
| RRS (MnO <sub>2</sub> nanosheets)          | 0.5-150 mU L <sup>-1</sup>             | 0.17 mU L <sup>-1</sup> | This work |
